# Supplementary material
Source: PubMed Central journal article supplement (PMC3788622)
Supplement: jm401100s_si_001.pdf [file jm401100s_si_001.pdf]

*Supporting Information for*

Animal toxicity of hairpin pyrrole-imidazole  
polyamides varies with the turn unit

*Fei Yang<sup>a,‡</sup>, Nicholas G. Nickols<sup>a,b,‡</sup>, Benjamin C. Li<sup>a</sup>, Jerzy O. Szablowski<sup>a</sup>, Shari R. Hamilton<sup>c</sup>,  
Jordan L. Meier<sup>a</sup>, Chieh-Mei Wang<sup>a</sup>, and Peter B. Dervan<sup>a\*</sup>*

**Contents:**

Figure S1: DNA thermal stabilization of polyamides **1-4**.

Figure S2: Serum concentration of **1-4** after subcutaneous injection.

Figure S3: Characterization of an  $\alpha$  amino polyamide cycle targeted to the sequence 5'-WGWWCW-3'.

Table S1: Liver microsomal stability of **1-4**.

Figure S4: Structure of fluorescein conjugated polyamides **6-9**.

Figure S5: Nuclear localization of **6-9** in the liver.

Table S2: MALDI-ToF characterization of polyamides **1-5**.

| Polyamide | 5'- TTGC <b>TGTTCT</b> GCAA -3' |                               |
|-----------|---------------------------------|-------------------------------|
|           | $T_m / ^\circ\text{C}$          | $\Delta T_m / ^\circ\text{C}$ |
| —         | 61.8 ( $\pm 0.5$ )              | —                             |
| <b>1</b>  | 74.1 ( $\pm 0.3$ )              | 12.3                          |
| <b>2</b>  | 75.1 ( $\pm 0.4$ )              | 13.3                          |
| <b>3</b>  | 70.1 ( $\pm 0.2$ )              | 8.3                           |
| <b>4</b>  | 74.9 ( $\pm 0.2$ )              | 13.2                          |

**Fig. S1.** DNA thermal stabilization analysis of compounds **1-4**.

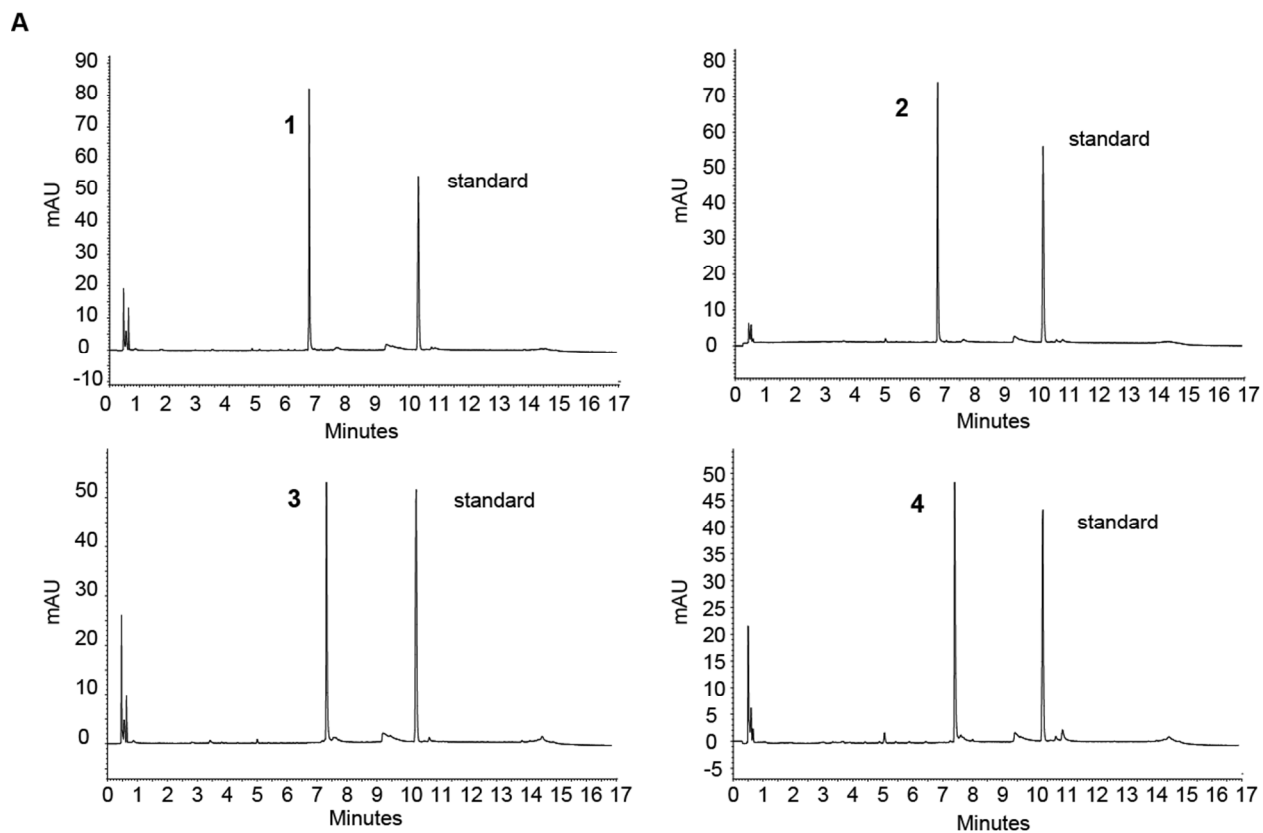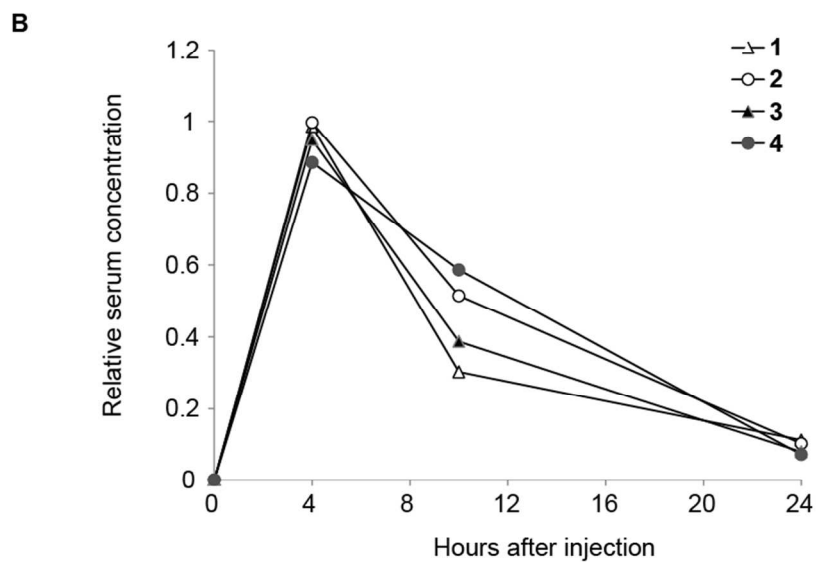

**Fig S2. (A)** Analytical HPLC traces of compounds 1-4 in the serum 4 hr after injection. **(B)** Relative serum levels of compounds 1-4 at 4 hr, 10 hr, and 24 hr after a single subcutaneous injection of each compound at 10 mg/kg.

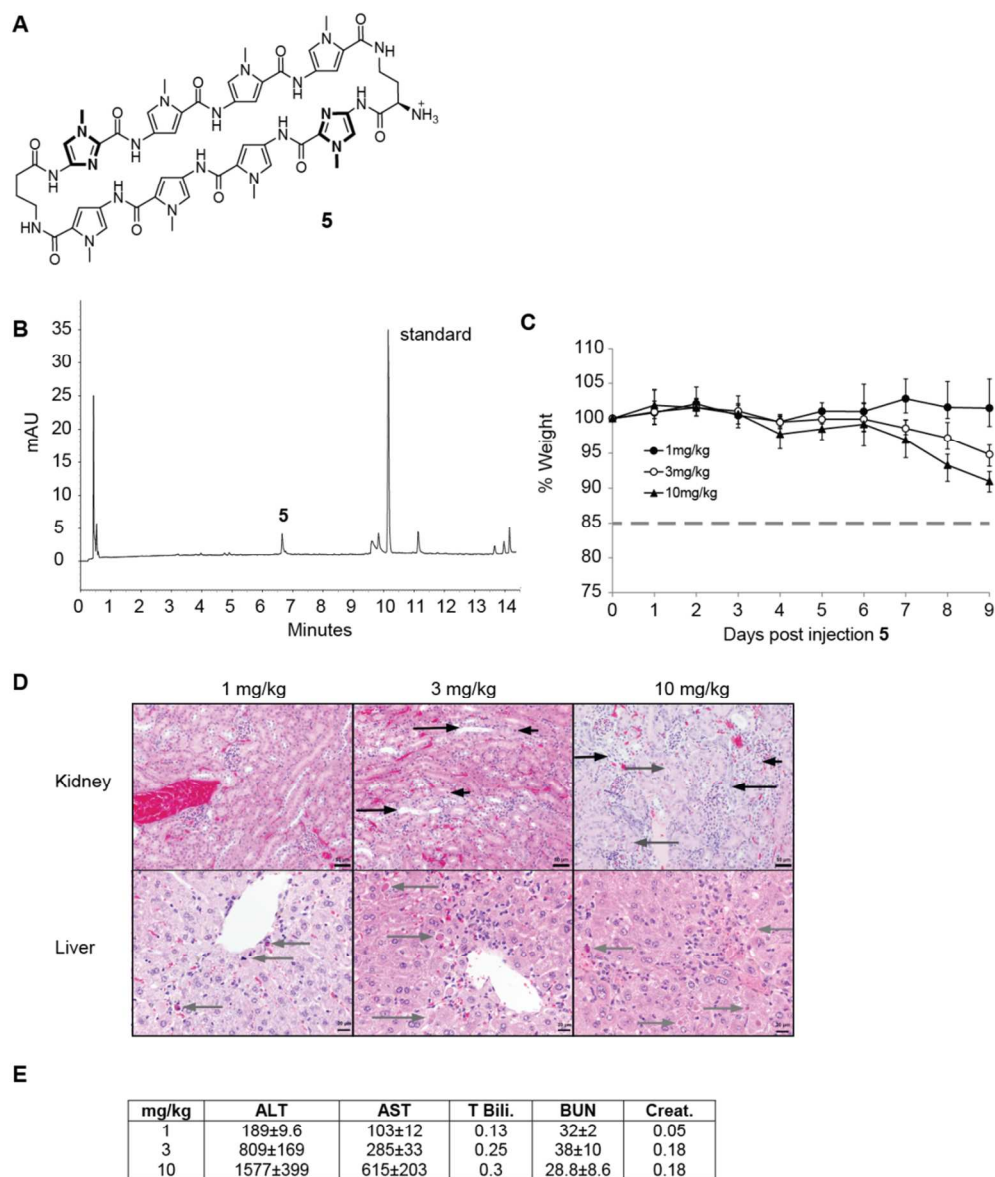

**Fig S3.** Characterization of a cyclic polyamide targeting the sequence 5'-WGWWCW-3'. **(A)** Chemical structure of compound 5. **(B)** Serum circulation of 5 4 hr after SC injection. **(C)** Changes in animal weights after a single SC injection of 5 at the indicated concentrations. **(D)** Kidney and liver histology of sacrificed animals after 9 days of monitoring. **(E)** Serum chemistry of animals treated with 5. **Liver:** long gray arrow=hepatocellular apoptosis/necrosis, arrowheads=outline area of bridging hepatocellular necrosis/apoptosis. **Kidney:** short gray arrow=tubular epithelial karyomegaly, long gray arrow=tubular epithelial apoptosis/necrosis, short black arrow=tubular epithelial mitoses, long black arrow=tubular epithelial attenuation

|                                      | Test conc (μM) | Test species | Mean remaining parent with NADPH (%) | Mean remaining parent NADPH-free (%) |
|--------------------------------------|----------------|--------------|--------------------------------------|--------------------------------------|
| Verapamil<br>high metabolism control | 1              | Human        | 4.2%                                 | 100%                                 |
|                                      | 1              | Mouse        | 1.1%                                 | 100%                                 |
| Warfarin<br>low metabolism control   | 1              | Human        | 100%                                 | 100%                                 |
|                                      | 1              | Mouse        | 100%                                 | 100%                                 |
| <b>1</b>                             | 1              | Human        | 96.9%                                | 92.3%                                |
|                                      | 1              | Mouse        | 95.2%                                | 96.8%                                |
| <b>2</b>                             | 1              | Human        | 91.9%                                | 100%                                 |
|                                      | 1              | Mouse        | 92.4%                                | 100%                                 |
| <b>3</b>                             | 1              | Human        | 95.3%                                | 94.9%                                |
|                                      | 1              | Mouse        | 97.3%                                | 100%                                 |
| <b>4</b>                             | 1              | Human        | 3.0%                                 | 3.8%                                 |
|                                      | 1              | Mouse        | 4.0%                                 | 4.9%                                 |

**Table S1.** Microsomal stability analysis of **1-4** in the presence and absence of NADPH. Samples were incubated for 1 hr at 37 °C with 1 mg/ml of human or mouse microsomes.

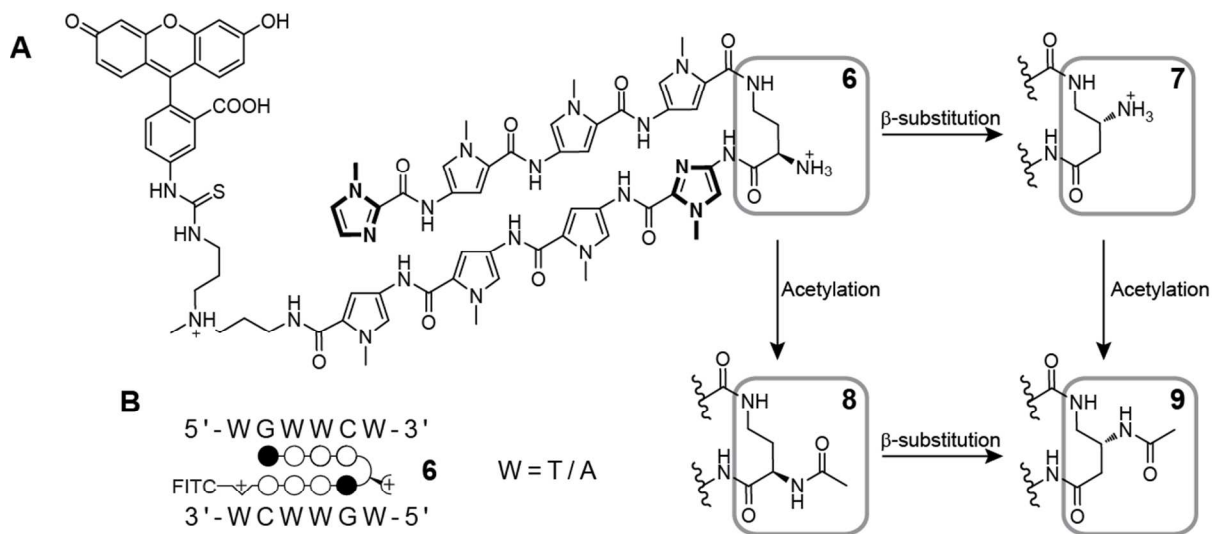

**Figure S4.** Chemical structures. **(A)** Structures of polyamides **6-9**. The compounds only vary by the amino substitution on the  $\gamma$ -turn unit. **(B)** The preferred DNA binding sequence of the polyamide core. Polyamide **6** is shown bound to the sequence 5'-WGWWCW-3'. Closed circles represent imidazole units and open circles represent pyrrole units.

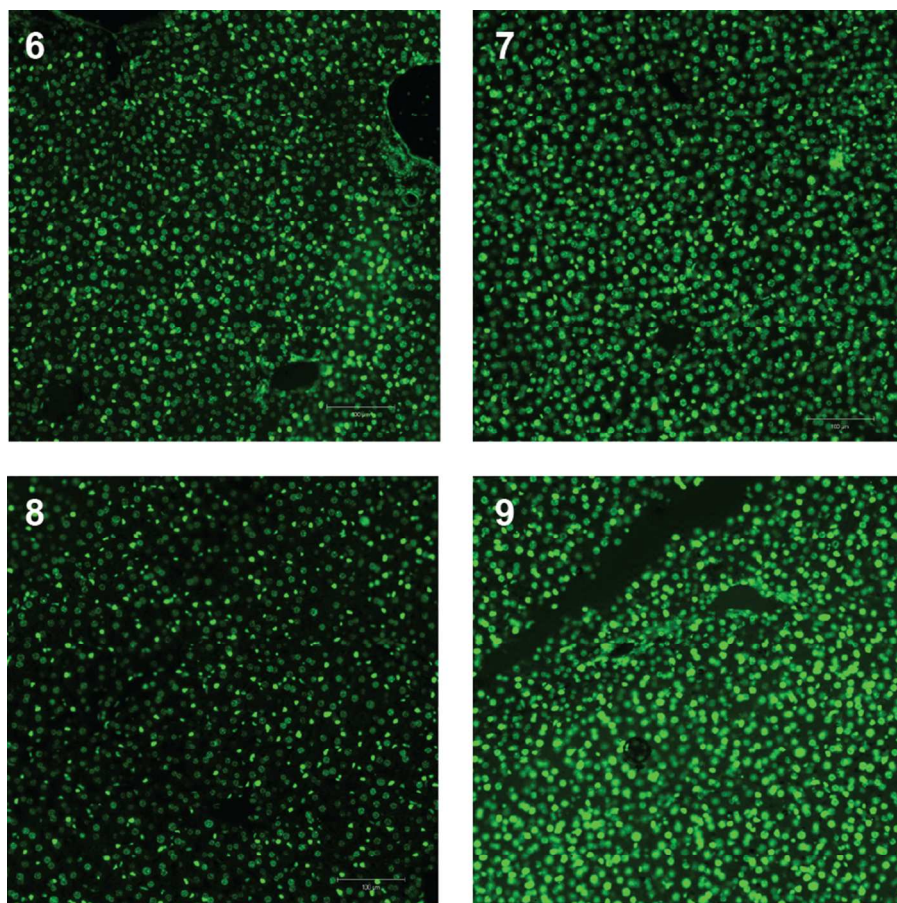

**Figure S5.** Nuclear localization of compounds **6-9** in the liver 24 hr after SC injection

| Compound | Chemical Formula                                                | Calculated Mass     |         | Observed Mass |
|----------|-----------------------------------------------------------------|---------------------|---------|---------------|
| <b>1</b> | C <sub>65</sub> H <sub>76</sub> N <sub>22</sub> O <sub>12</sub> | [M+H] <sup>+</sup>  | 1357.44 | 1357.86       |
| <b>2</b> | C <sub>65</sub> H <sub>76</sub> N <sub>22</sub> O <sub>12</sub> | [M+H] <sup>+</sup>  | 1357.44 | 1357.69       |
| <b>3</b> | C <sub>67</sub> H <sub>78</sub> N <sub>22</sub> O <sub>13</sub> | [M+H] <sup>+</sup>  | 1399.48 | 1399.91       |
| <b>4</b> | C <sub>67</sub> H <sub>78</sub> N <sub>22</sub> O <sub>13</sub> | [M+H] <sup>+</sup>  | 1399.48 | 1399.36       |
| <b>5</b> | C <sub>54</sub> H <sub>61</sub> N <sub>21</sub> O <sub>10</sub> | [M+Na] <sup>+</sup> | 1186.5  | 1186.6        |

**Table S2.** MALDI-ToF analysis of compounds.
